# Supplementary material for: The effect of pendant benzene-1,3,5-tricarboxamides in the middle block of ABA triblock copolymers: synthesis and mechanical properties
Source: Royal Society of Chemistry journal article supplement (doi:10.1039/c3py01189e), 2013-10-24
Supplement: c3py01189e.pdf [file c3py01189e.pdf]

Electronic Supplementary Information (ESI) for

## The effect of pendant benzene-1,3,5-tricarboxamides in the middle block of ABA triblock copolymers: synthesis and mechanical properties

Nobuhiko Hosono, Louis M. Pitet, Anja R. A. Palmans\* and E. W. Meijer\*

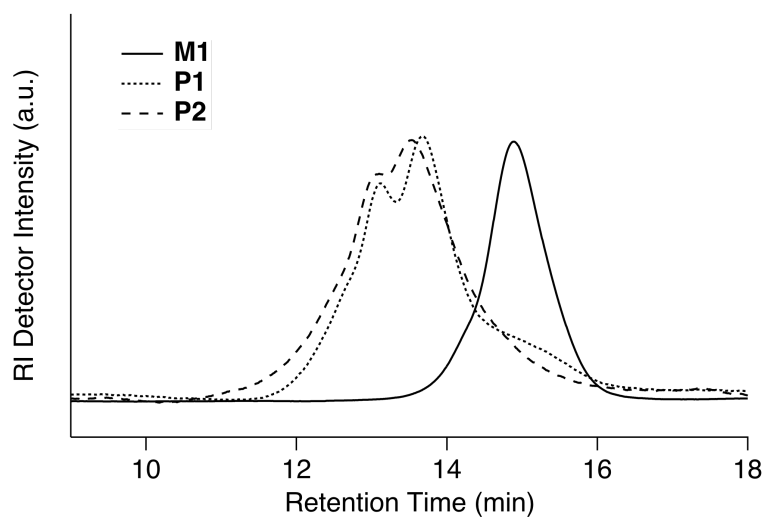

**Figure S1.** Size-exclusion chromatography (SEC) traces of **M1** (solid line), **P1** (dashed line), and **P2** (broken line) recorded with a refractive index (RI) detector using THF as eluent.
